# Supplementary material for: Optimizing the Growth of Silage Maize by Adjusting Planting Density and Nitrogen Application Rate Based on Farmers’ Conventional Planting Habits
Source: MDPI journal article supplement (doi:10.3390/agronomy13112785), 2023-11-09
Supplement: s1 [file s1]

**Table S1.** The main effect result values of planting density and nitrogen application rate on stem diameter, plant height and LAI at three growth stages.

| Treatments                                          |    | Stem diameter (mm plant <sup>-1</sup> ) |               |                | Plant height (cm plant <sup>-1</sup> ) |               |                | LAI            |               |                |
|-----------------------------------------------------|----|-----------------------------------------|---------------|----------------|----------------------------------------|---------------|----------------|----------------|---------------|----------------|
|                                                     |    | Jointing Stage                          | Trumpet Stage | Maturity Stage | Jointing Stage                         | Trumpet Stage | Maturity Stage | Jointing Stage | Trumpet Stage | Maturity Stage |
| planting density<br>(plant ha <sup>-1</sup> )       | D1 | 25.05a                                  | 24.59a        | 22.50a         | 77.62b                                 | 203.23b       | 272.556a       | 2.47b          | 4.77c         | 5.20b          |
|                                                     | D2 | 23.39b                                  | 22.62b        | 21.94ab        | 80.80a                                 | 210.72a       | 272.778a       | 2.91a          | 6.42b         | 5.73b          |
|                                                     | D3 | 22.56b                                  | 21.86b        | 21.60b         | 76.60b                                 | 211.77a       | 269.00a        | 3.17a          | 7.32a         | 6.39a          |
| Nitrogen application rate<br>(kg ha <sup>-1</sup> ) | N1 | 23.28a                                  | 22.79b        | 21.31b         | 74.85c                                 | 200.88c       | 255.33b        | 2.61b          | 5.54c         | 5.23b          |
|                                                     | N2 | 23.70a                                  | 22.01b        | 22.00b         | 78.15b                                 | 208.27b       | 277.22a        | 2.78b          | 6.01b         | 6.08a          |
|                                                     | N3 | 24.01a                                  | 24.26a        | 22.73a         | 82.02a                                 | 216.56a       | 281.78a        | 3.17a          | 6.95a         | 6.02a          |

Different letters represent significant differences at  $P < 0.05$ . D1, D2 and D3 represents 65000, 80000, and 95000 plants ha<sup>-1</sup>, and N1, N2 and N3 represents 150, 230, and 310 kg ha<sup>-1</sup> nitrogen, respectively.

**Table S2.** The main effect result values of planting density and nitrogen application rate on CP, ADF, NDF, starch, and WSC.

| Treatments                                          |    | CP (%) | ADF (%) | NDF (%) | Starch (%) | WSC (%) |
|-----------------------------------------------------|----|--------|---------|---------|------------|---------|
| planting density<br>(plant ha <sup>-1</sup> )       | D1 | 8.82a  | 29.84a  | 50.22a  | 20.51c     | 11.17a  |
|                                                     | D2 | 8.51b  | 27.73b  | 48.24b  | 24.27a     | 11.10a  |
|                                                     | D3 | 8.49b  | 29.19a  | 49.14ab | 22.07b     | 12.04a  |
| Nitrogen application rate<br>(kg ha <sup>-1</sup> ) | N1 | 8.36b  | 29.84a  | 50.61a  | 20.96b     | 9.31b   |
|                                                     | N2 | 8.70a  | 27.73b  | 48.12b  | 23.12a     | 12.16a  |
|                                                     | N3 | 8.77a  | 29.19a  | 48.88b  | 22.77a     | 12.84a  |

CP: crude protein; NDF: neutral detergent fiber; ADF: acid detergent fiber; WSC: water-soluble carbohydrate. Different letters represent significant differences at  $P < 0.05$ . D1, D2 and D3 represents 65000, 80000, and 95000 plants ha<sup>-1</sup>, and N1, N2 and N3 represents 150, 230, and 310 kg ha<sup>-1</sup> nitrogen, respectively.
